# Supplementary material
Source: PubMed Central journal article supplement (PMC2678623)
Supplement: 0902752106_0902752106SI.pdf [file 0902752106_0902752106SI.pdf]

# Supporting Information

Cohen-Karni et al. 10.1073/pnas.0902752106

[Movie S1 \(WMV\)](#)

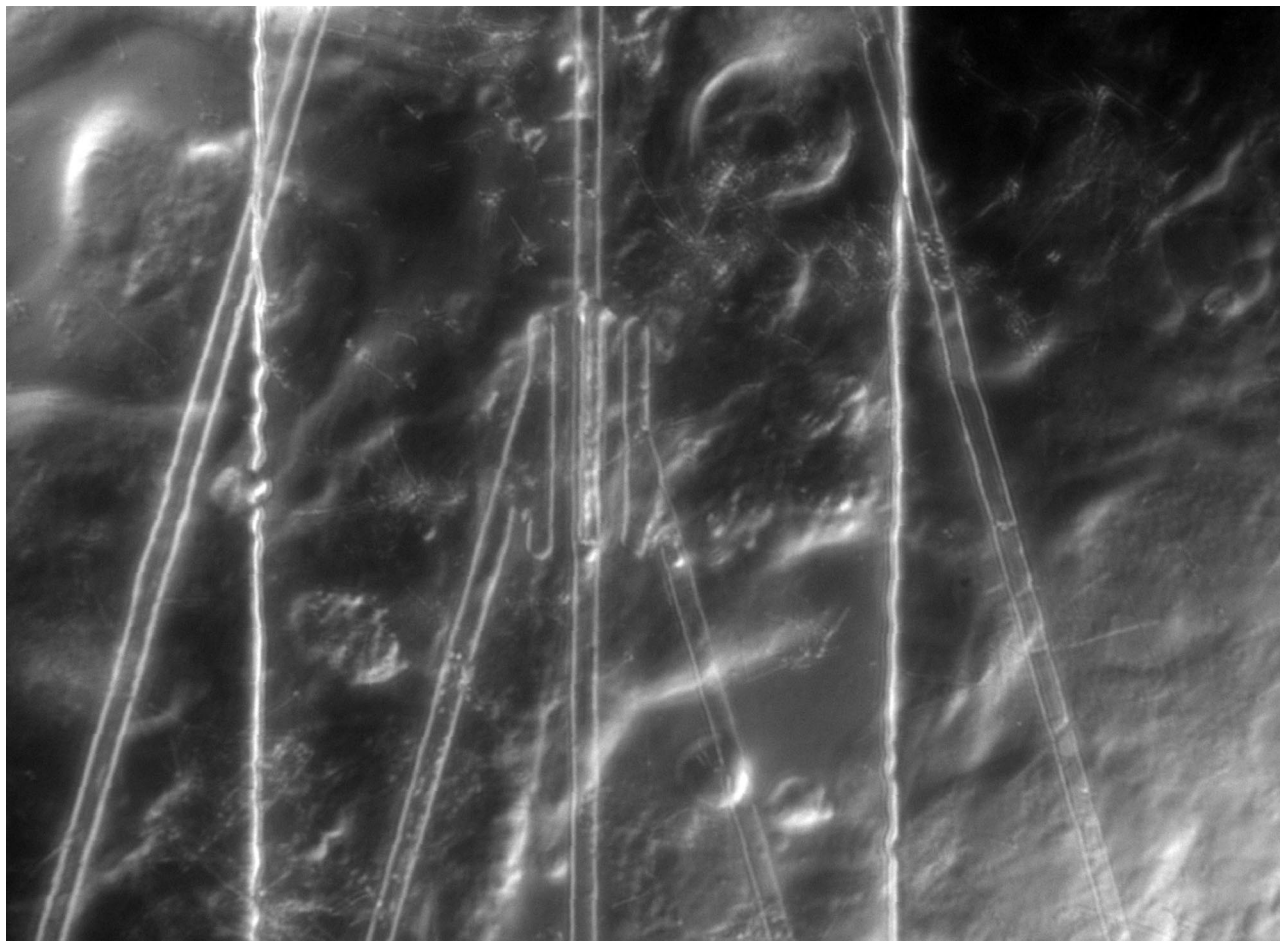

**Movie S1.** Optical microscopy image of a group of spontaneously beating cells over a NW-FET (corresponds to Fig. 4 A and B).

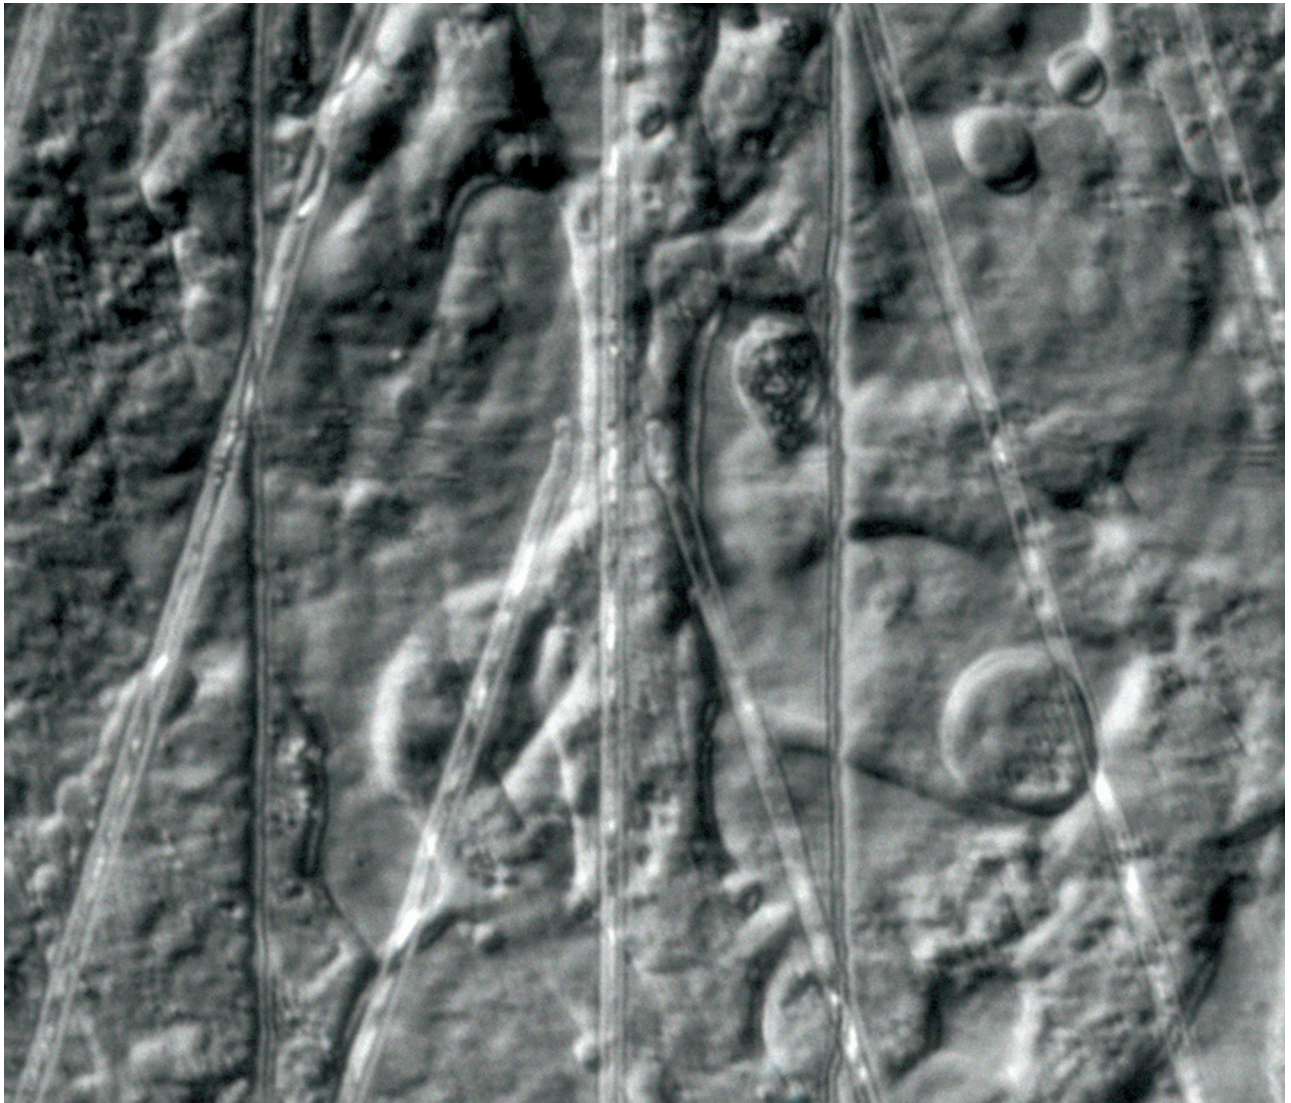

**Movie S2.** Optical microscopy image of a relatively distinct cell in a spontaneously beating monolayer over a NWFET (corresponds to Fig. 4 C and D).

[Movie S2 \(MOV\)](#)
